# Supplementary figures and images for: Computational insights into phthalimide-core non-fullerene acceptors for next-generation organic solar cells
Source: Royal Society of Chemistry journal article supplement (doi:10.1039/d5ra04527d), 2025-01-01

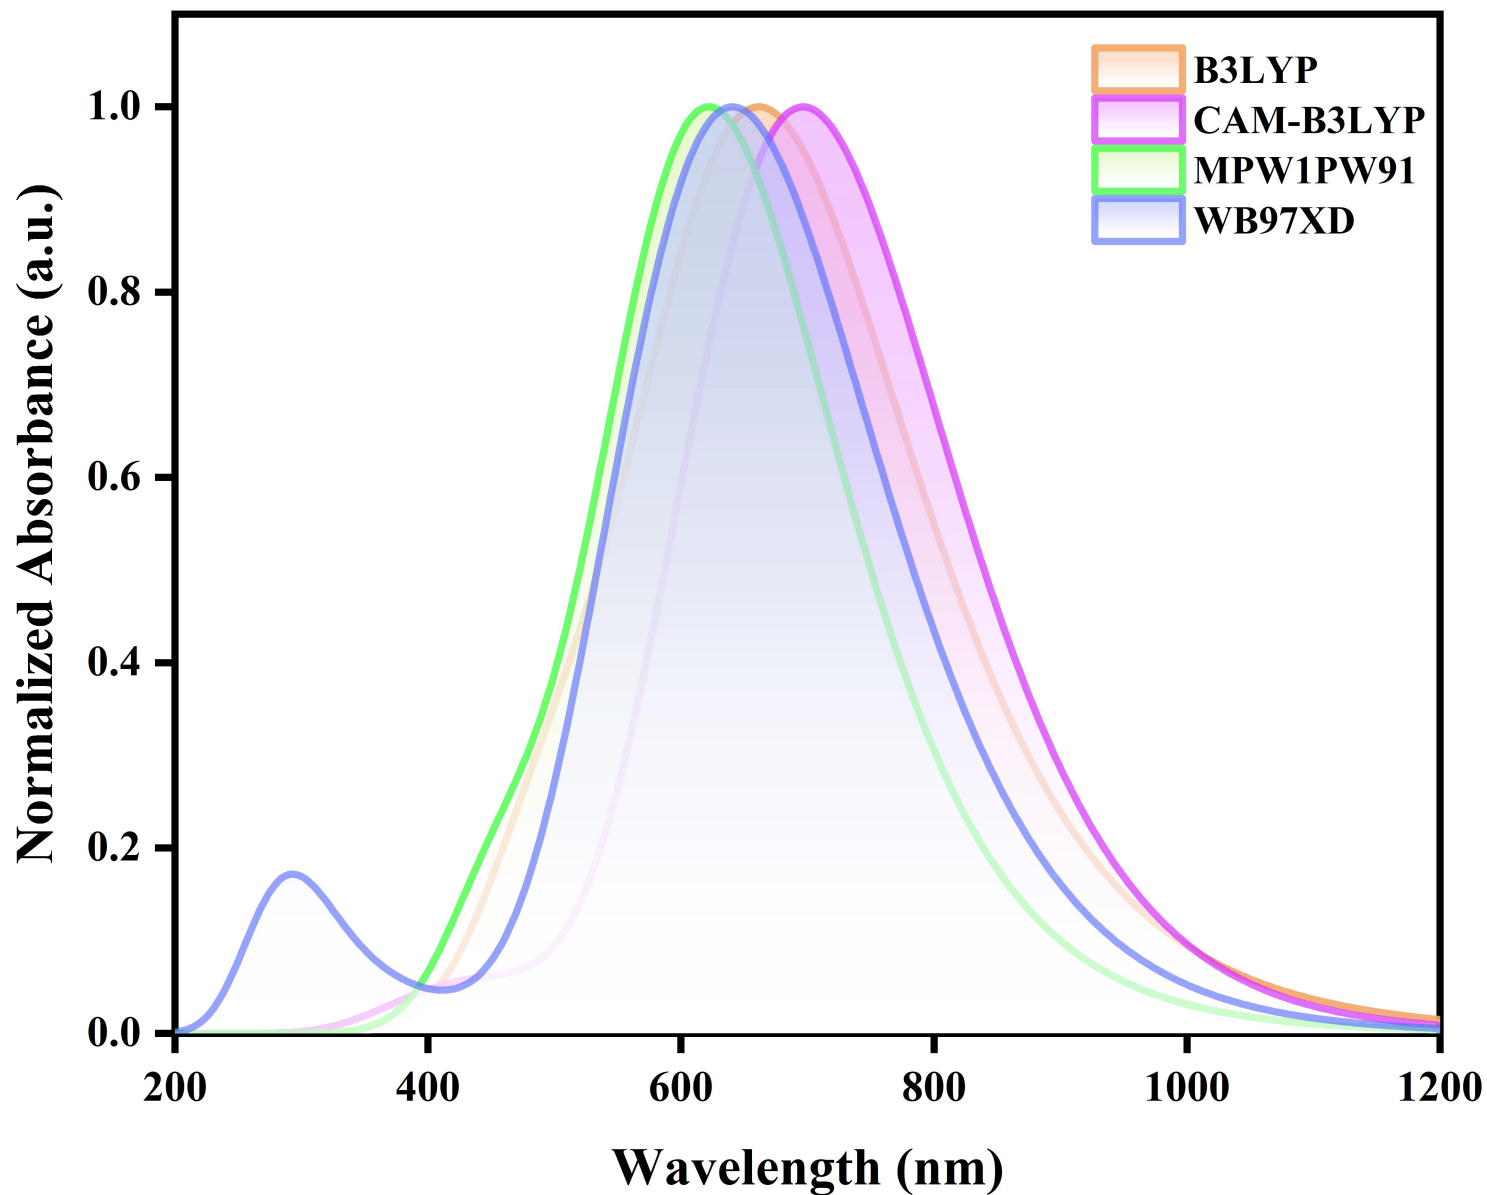

Supplement: d5ra04527d2.pdf [file d5ra04527d2.pdf]
